# Supplementary material for: Productivity burden of smoking in Australia: a life table modelling study
Source: PubMed Central journal article supplement — Tob Control. 2018 Jul 16;28(3):297–304. doi: 10.1136/tobaccocontrol-2018-054263 (PMC6580760; doi:10.1136/tobaccocontrol-2018-054263), 2018-07-16
Supplement: tobaccocontrol-2018-054263supp001.pdf [file tobaccocontrol-2018-054263supp001.pdf]

## APPENDIX

**Supplementary Table 1:** Risk of deaths by age, sex and smoking status in Australia

| Age | Male                 |                        |                            | Female               |                        |                            |
|-----|----------------------|------------------------|----------------------------|----------------------|------------------------|----------------------------|
|     | Total Mortality Risk | Smoking Mortality Risk | Non-smoking Mortality Risk | Total Mortality Risk | Smoking Mortality Risk | Non-smoking Mortality Risk |
| 20  | 0-000505             | 0-000370               | 0-000197                   | 0-000238             | 0-000187               | 0-000149                   |
| 21  | 0-000475             | 0-000406               | 0-000213                   | 0-000115             | 0-000205               | 0-000161                   |
| 22  | 0-000510             | 0-000444               | 0-000230                   | 0-000195             | 0-000224               | 0-000174                   |
| 23  | 0-000579             | 0-000487               | 0-000250                   | 0-000297             | 0-000246               | 0-000189                   |
| 24  | 0-000579             | 0-000533               | 0-000270                   | 0-000152             | 0-000269               | 0-000205                   |
| 25  | 0-000548             | 0-000584               | 0-000293                   | 0-000183             | 0-000295               | 0-000222                   |
| 26  | 0-000669             | 0-000639               | 0-000317                   | 0-000277             | 0-000323               | 0-000240                   |
| 27  | 0-000628             | 0-000700               | 0-000343                   | 0-000253             | 0-000354               | 0-000260                   |
| 28  | 0-000633             | 0-000767               | 0-000372                   | 0-000235             | 0-000388               | 0-000282                   |
| 29  | 0-000664             | 0-000840               | 0-000402                   | 0-000299             | 0-000425               | 0-000305                   |
| 30  | 0-000706             | 0-000920               | 0-000436                   | 0-000223             | 0-000466               | 0-000331                   |
| 31  | 0-000828             | 0-001008               | 0-000472                   | 0-000332             | 0-000510               | 0-000358                   |
| 32  | 0-000820             | 0-001104               | 0-000511                   | 0-000356             | 0-000559               | 0-000388                   |
| 33  | 0-000797             | 0-001209               | 0-000553                   | 0-000362             | 0-000612               | 0-000420                   |
| 34  | 0-000848             | 0-001324               | 0-000599                   | 0-000445             | 0-000671               | 0-000455                   |
| 35  | 0-000860             | 0-001524               | 0-000671                   | 0-000639             | 0-001224               | 0-000544                   |
| 36  | 0-001019             | 0-001805               | 0-000795                   | 0-000527             | 0-001009               | 0-000448                   |
| 37  | 0-000961             | 0-001701               | 0-000749                   | 0-000569             | 0-001088               | 0-000483                   |
| 38  | 0-001114             | 0-001973               | 0-000869                   | 0-000610             | 0-001167               | 0-000518                   |
| 39  | 0-001191             | 0-002109               | 0-000929                   | 0-000661             | 0-001265               | 0-000562                   |
| 40  | 0-001213             | 0-002148               | 0-000946                   | 0-000708             | 0-001356               | 0-000602                   |
| 41  | 0-001340             | 0-002374               | 0-001045                   | 0-000846             | 0-001620               | 0-000719                   |
| 42  | 0-001542             | 0-002731               | 0-001203                   | 0-000873             | 0-001671               | 0-000742                   |
| 43  | 0-001753             | 0-003105               | 0-001368                   | 0-000901             | 0-001724               | 0-000766                   |
| 44  | 0-001686             | 0-002986               | 0-001315                   | 0-000936             | 0-001792               | 0-000796                   |
| 45  | 0-001705             | 0-003142               | 0-001330                   | 0-001090             | 0-001878               | 0-000927                   |
| 46  | 0-001742             | 0-003210               | 0-001359                   | 0-001078             | 0-001857               | 0-000917                   |
| 47  | 0-002158             | 0-003977               | 0-001684                   | 0-001351             | 0-002326               | 0-001148                   |
| 48  | 0-002561             | 0-004720               | 0-001998                   | 0-001494             | 0-002573               | 0-001270                   |
| 49  | 0-002536             | 0-004673               | 0-001978                   | 0-001544             | 0-002658               | 0-001312                   |
| 50  | 0-002860             | 0-005271               | 0-002231                   | 0-001724             | 0-002969               | 0-001466                   |
| 51  | 0-002939             | 0-005416               | 0-002292                   | 0-001790             | 0-003082               | 0-001521                   |
| 52  | 0-002859             | 0-005269               | 0-002230                   | 0-002023             | 0-003485               | 0-001720                   |
| 53  | 0-003473             | 0-006401               | 0-002709                   | 0-002177             | 0-003749               | 0-001850                   |
| 54  | 0-003821             | 0-007042               | 0-002980                   | 0-002323             | 0-004001               | 0-001975                   |
| 55  | 0-004277             | 0-008477               | 0-003336                   | 0-002434             | 0-004899               | 0-002069                   |
| 56  | 0-004338             | 0-008599               | 0-003384                   | 0-002682             | 0-005397               | 0-002279                   |
| 57  | 0-004821             | 0-009557               | 0-003761                   | 0-002731             | 0-005498               | 0-002322                   |
| 58  | 0-005260             | 0-010427               | 0-004103                   | 0-003151             | 0-006342               | 0-002678                   |
| 59  | 0-005301             | 0-010508               | 0-004135                   | 0-003273             | 0-006588               | 0-002782                   |
| 60  | 0-006559             | 0-013002               | 0-005116                   | 0-003683             | 0-007412               | 0-003130                   |
| 61  | 0-006402             | 0-012689               | 0-004993                   | 0-003760             | 0-007568               | 0-003196                   |
| 62  | 0-007107             | 0-014087               | 0-005543                   | 0-004395             | 0-008847               | 0-003736                   |
| 63  | 0-007755             | 0-015373               | 0-006049                   | 0-004484             | 0-009025               | 0-003811                   |
| 64  | 0-008725             | 0-017294               | 0-006805                   | 0-005008             | 0-010079               | 0-004256                   |
| 65  | 0-009207             | 0-025430               | 0-007182                   | 0-004964             | 0-015012               | 0-004220                   |
| 66  | 0-010255             | 0-028324               | 0-007999                   | 0-006265             | 0-018945               | 0-005325                   |
| 67  | 0-010754             | 0-029702               | 0-008388                   | 0-007080             | 0-021410               | 0-006018                   |
| 68  | 0-012387             | 0-034212               | 0-009662                   | 0-007403             | 0-022385               | 0-006292                   |
| 69  | 0-013321             | 0-036792               | 0-010390                   | 0-007892             | 0-023865               | 0-006708                   |

Age- and sex-specific mortality rates for single-year age-bands were obtained from the Australian General Record of Incidence of Mortality data for 2015 (12). Smoking prevalence data were drawn from the Australian National Health Survey 2014-2015 (13). Probabilities of death for smokers and non-smokers were calculated from mortality risk in the wider population and sex-specific smoking population attributable risk percentage for 35-69 year olds reported by Peto et al (14), and extrapolated below the age of 35 years using exponential equations for smokers and non-smokers.

## APPENDIX

**Supplementary Table 2:** Productivity indices for smokers and non-smokers by age group and sex

| Age group | Male   |            | Female |            |
|-----------|--------|------------|--------|------------|
|           | Smoker | Non-smoker | Smoker | Non-smoker |
| 20-24y    | 0.504  | 0.518      | 0.454  | 0.466      |
| 25-29y    | 0.743  | 0.763      | 0.533  | 0.548      |
| 30-34y    | 0.743  | 0.763      | 0.533  | 0.548      |
| 35-39y    | 0.785  | 0.807      | 0.516  | 0.530      |
| 40-44y    | 0.785  | 0.807      | 0.516  | 0.530      |
| 45-49y    | 0.727  | 0.747      | 0.530  | 0.545      |
| 50-54y    | 0.727  | 0.747      | 0.530  | 0.545      |
| 55-59y    | 0.636  | 0.653      | 0.459  | 0.471      |
| 60-64y    | 0.486  | 0.500      | 0.313  | 0.322      |
| 65-69y    | 0.313  | 0.321      | 0.313  | 0.322      |

Age and sex-specific productivity indices for smokers and non-smokers were calculated by applying productivity penalties of 0.957 for non-smokers and 0.932 for smokers (calculated from absenteeism and presenteeism data drawn from Bunn et al (11)) to the sex and age-specific weighted-average maximum working days in a year among Australians aged 20 to 69 years (15).
